# Supplementary material for: Efficient photo-Fenton catalysis using magnetic iron nanoparticles decorated boron nitride quantum dots: theoretical and experimental investigations
Source: Royal Society of Chemistry journal article supplement (doi:10.1039/d3ra00234a), 2023-01-01
Supplement: d3ra00234a1.pdf [file d3ra00234a1.pdf]

## Electronic Supplementary Information

### **Iron Nanoparticles Decorated Boron Nitride Quantum Dots (Fe@BNQDs) as Improvement in Photo-Fenton Catalysis, Theoretical and Experimental Investigations**

Shinwar A. Idrees,<sup>a\*</sup> Lazgin A. Jamil,<sup>a\*</sup> and Khalid M. Omer<sup>b\*</sup>

a Dept. of Chemistry, Faculty of Science, University of Zakho, Kurdistan Region, Iraq

b Dept. of Chemistry, Faculty of Science, University of Sulaimani, Kurdistan Region,  
Iraq

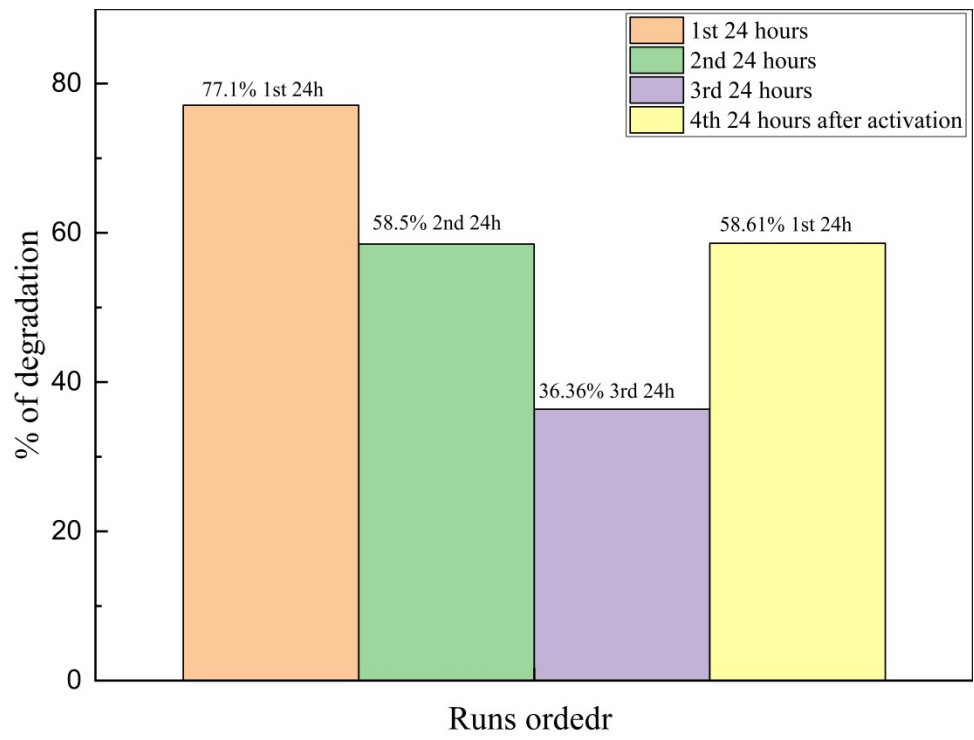

**Figure S1.** efficiency (time course) of photo-catalytic degradation of folic acid by Fe@BNQDs.

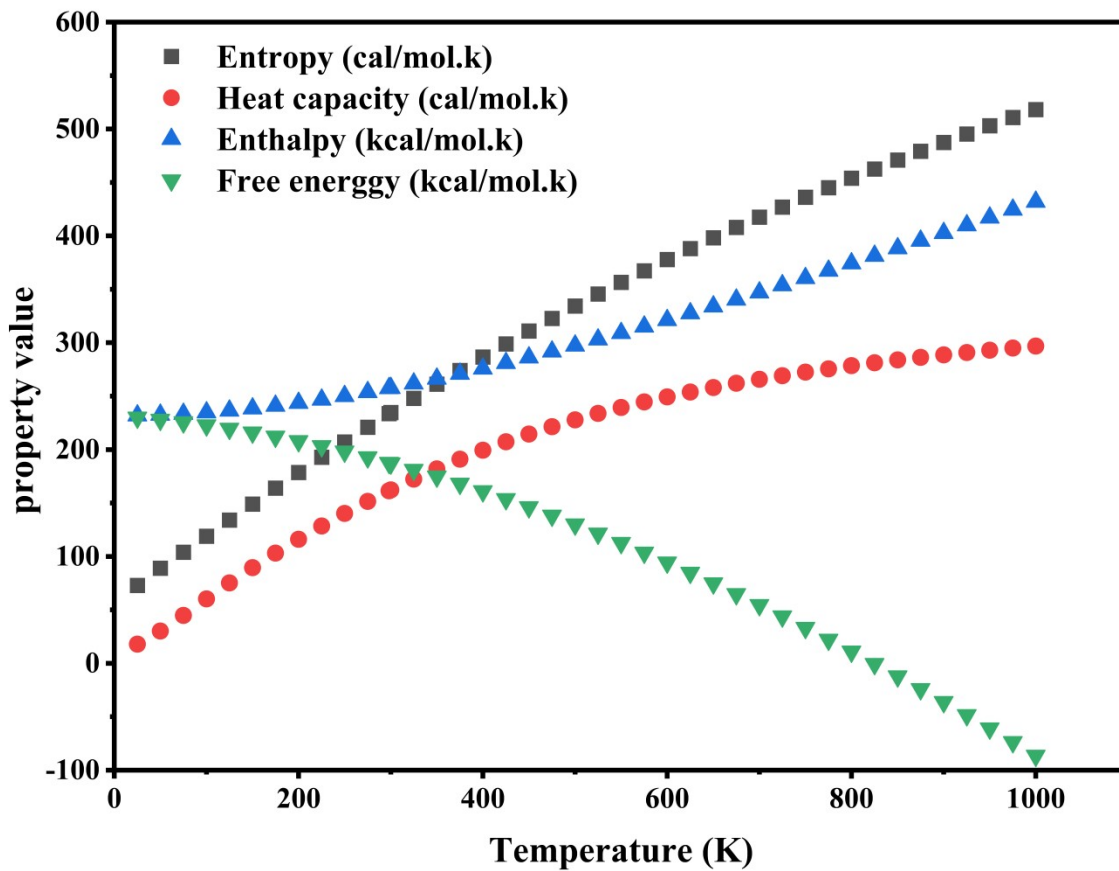

**Figure S2.** Thermochemical properties of Fe@BNQDs calculated for a single sheet by DFT/GGA/PBE Dmol<sup>3</sup> code.

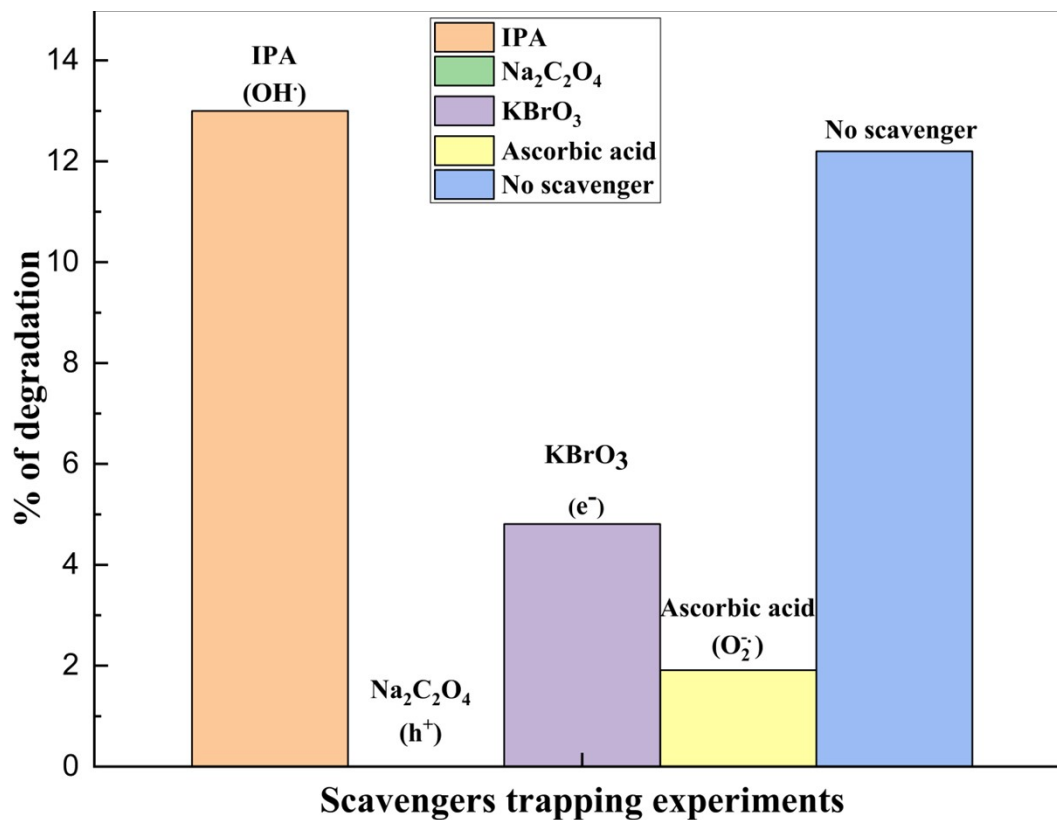

**Figure S3.** Scavengers trapping experiments of active species involved in photo-degradation of folic acid over Fe@BNQDs

Table S1. Analysis of Variance and estimated regression coefficient for percent of degradation of folic acid.

| Source          | DF | Coef.   | Seq SS  | Adj SS  | Adj MS  | F-value | P-value |
|-----------------|----|---------|---------|---------|---------|---------|---------|
| Regression      | 9  |         | 187.126 | 187.126 | 20.7918 | 7.10    | 0.013   |
| Linear          | 3  |         | 127.679 | 55.864  | 18.6213 | 6.36    | 0.027   |
| Fe@BNQDs (g/mL) | 1  | 192.879 | 57.453  | 25.114  | 25.1138 | 8.57    | 0.026   |
| H2O2 (M)        | 1  | 56.306  | 37.563  | 34.762  | 34.7620 | 11.87   | 0.014   |
| Temp.(C)        | 1  | 0.154   | 32.663  | 0.241   | 0.2411  | 0.08    | 0.784   |
| Square          | 3  |         | 19.760  | 19.760  | 6.5866  | 2.25    | 0.183   |
| Fe@BNQDs        | 1  | -798.58 | 13.414  | 15.152  | 15.1518 | 5.17    | 0.063   |

|                                                                 |    |        |         |        |         |                       |       |
|-----------------------------------------------------------------|----|--------|---------|--------|---------|-----------------------|-------|
| (g/mL)*Fe@BNQDs                                                 |    |        |         |        |         |                       |       |
| (g/mL)                                                          |    |        |         |        |         |                       |       |
| H <sub>2</sub> O <sub>2</sub> (M)*H <sub>2</sub> O <sub>2</sub> | 1  | -31.74 | 6.326   | 6.308  | 6.3079  | 2.15                  | 0.193 |
| (M)                                                             |    |        |         |        |         |                       |       |
|                                                                 | 1  | 0.001  | 0.019   | 0.019  | 0.0193  | 0.01                  | 0.938 |
| Temp.(C)*Temp.(C)                                               |    |        |         |        |         |                       |       |
| Interaction                                                     | 3  |        | 39.688  | 39.688 | 13.2292 | 4.52                  | 0.055 |
| Fe@BNQDs                                                        | 1  | 115.25 | 5.313   | 5.313  | 5.3130  | 1.81                  | 0.227 |
| (g/mL)*H <sub>2</sub> O <sub>2</sub> (M)                        |    |        |         |        |         |                       |       |
| Fe@BNQDs                                                        | 1  | -2.825 | 7.981   | 7.981  | 7.9806  | 2.72                  | 0.150 |
| (g/mL)*Temp.(C)                                                 |    |        |         |        |         |                       |       |
| H <sub>2</sub> O <sub>2</sub>                                   | 1  | -1.284 | 26.394  | 26.394 | 26.3939 | 9.01                  | 0.024 |
| (M)*Temp.(C)                                                    |    |        |         |        |         |                       |       |
| Residual Error                                                  | 6  |        | 17.578  | 17.578 | 2.9297  |                       |       |
| Lack-of-Fit                                                     | 4  |        | 16.569  | 16.569 | 4.1424  | 8.21                  | 0.111 |
| Pure Error                                                      | 2  |        | 1.009   | 1.009  | 0.5043  |                       |       |
| Total                                                           | 15 |        | 204.704 |        |         | R <sup>2</sup> =91.41 |       |

**Table S2.** the Calculated lattice parameters of Fe@BNQDs and h-BN.

| Lattice parameter (primitive cube)      |         |         |         |                    |           |          |           | Bond length (Å) |       |
|-----------------------------------------|---------|---------|---------|--------------------|-----------|----------|-----------|-----------------|-------|
| Photo-catalyst                          | a(Å)    | b(Å)    | c(Å)    | V(Å <sup>3</sup> ) | Alpha (α) | Beta (β) | Gamma (γ) | B-N             | 1.63  |
| Fe@BNQDs                                | 3.86947 | 3.86947 | 3.86947 | 57.936             | 90°       | 90°      | 90°       | B-Fe            | 1.82  |
|                                         |         |         |         |                    |           |          |           | N-Fe            | 2.73  |
| Lattice parameter (Face centered cubic) |         |         |         |                    |           |          |           | Bond length (Å) |       |
| h-BN                                    | 3.615   | 3.615   | 3.615   | 48.077             | 90°       | 90°      | 90°       | B-N             | 1.574 |

**Table S3.** The bandgap ( $E_g$ , eV) values of Fe@BNQDs nanostructure utilizing norm conserving pseudopotentials.

| DMol3 code            |                     |              |                  |       |             |       |
|-----------------------|---------------------|--------------|------------------|-------|-------------|-------|
|                       | m-GGA/eV            |              | GGA/eV           |       | LDA/eV      |       |
| M06-L                 | 0.868               |              | BLYP Gremme & TS | 1.072 | PWC         | 0.762 |
| M11-L                 | 0.286               |              | BOP              | 1.022 | VWN         | 0.763 |
| MS0                   | 0.500               |              | BP               | 0.904 |             |       |
| MS1                   | 0.495               |              | HCTH             | 1.019 |             |       |
| MS2                   | 0.564               |              | PBE              | 0.877 |             |       |
| Rev-TPSS              | 0.92                |              | PBEsol           | 0.772 |             |       |
| TPSS                  | 0.885               |              | PW91             | 0.903 |             |       |
|                       |                     |              | RPBE             | 0.899 |             |       |
|                       |                     |              | VWN-BP           | 0.906 |             |       |
| CASTEP code           |                     |              |                  |       |             |       |
|                       | Hybrid functions/eV |              | GGA/eV           |       | LDA/eV      |       |
| B3LYP                 | Direct              | 1.839        | PBE              | 0.465 | CA-PZ       | 0.626 |
|                       | <b>Indirect</b>     | <b>2.295</b> |                  |       |             |       |
| HSE06                 |                     | 1.002        | PBEsol           | 0.483 |             |       |
|                       |                     |              | PW91             | 0.59  |             |       |
|                       |                     |              | WC               | 0.503 |             |       |
|                       |                     |              | RPBE             | 0.605 |             |       |
| Experimental value/eV |                     |              |                  |       | <b>2.39</b> |       |

## Band Edges calculations

Band Edges (ECB, EVB) for Fe@ BNQDs ( $\text{Fe}_{1.5} \text{BNO}_5$ =according to EDX results)

CB and VB for Fe@ BNQDs

$$E_{VB} = X - E_c + 0.5E_g$$

$$E_{CB} = X - E_c - 0.5E_g$$

$$E_{VB} = E_{CB} + E_g$$

$$X = 1/2(E_{EA} + E_{IE})$$

$$1\text{eV} = 1.6 \times 10^{-19} \text{ J} = 1.6 \times 10^{-22} \text{ KJ}$$

$$? \frac{\text{Kj}}{\text{mol}} = 1\text{eV} \times \frac{1.6 \times 10^{-22} \text{ KJ}}{1\text{eV}} \times \frac{6.022 \times 10^{23}}{1\text{mol}} = 96.48 \frac{\text{Kj}}{\text{mol}}$$

### Calculations of X for Fe@ BNQDs:

$$\mathbf{B} \left\{ \begin{array}{l} \mathbf{E_{IE}} = 800 \text{ kj/mol} \quad \div \quad 96.48 = 8.29 \text{ eV} \\ \mathbf{E_{EA}} = 27 \quad \text{kj/mol} \quad \div \quad 96.48 = 0.2798 \text{ eV} \end{array} \right.$$

$$\mathbf{X_B} = 1/2(8.29+0.2798) = 4.28 \text{ eV}$$

$$\mathbf{O} \left\{ \begin{array}{l} \mathbf{E_{IE}} = 1313.9 \text{ kj/mol} \quad \div \quad 96.48 = 13.62 \text{ eV} \\ \mathbf{E_{EA}} = 141 \quad \text{kj/mol} \quad \div \quad 96.48 = 1.46 \text{ eV} \end{array} \right.$$

$$\mathbf{X_O} = 1/2(13.62+1.46) = 7.54 \text{ eV}$$

$$\mathbf{X_N} = 7.3 \text{ eV}$$

$$\mathbf{X_{Fe}} = 4.0275 \text{ eV}$$

**This calculation are based on EDX results**

| Element | Wt. % |
|---------|-------|
| B       | 5.69  |
| N       | 6.46  |
| O       | 52.14 |
| Fe      | 35.70 |

$$X_{\text{Fe@BNQDs}} = (6124212.595)^{0.105} = 5.16 \text{ eV}$$

$$E_{VB} = 5.16 - 4.5 + (0.5 * 2.39 \text{ eV}) = 1.855 \text{ eV}$$

$$E_{CB} = 5.16 - 4.5 - (0.5 * 2.39 \text{ eV}) = -0.535 \text{ eV}$$
